# Supplementary material for: Twisted configuration pyrene derivative: exhibiting pure blue monomer photoluminescence and electrogenerated chemiluminescence emissions in non-aqueous media
Source: Royal Society of Chemistry journal article supplement (doi:10.1039/c7ra01586k), 2017-01-01
Supplement: c7ra01586k1.pdf [file c7ra01586k1.pdf]

Electronic Supplementary Material (ESI) for RSC Advances.

This journal is © The Royal Society of Chemistry 2017

## **Twisted configuration pyrene derivative: exhibiting pure blue monomer photoluminescence and electrogenerated chemiluminescence emissions in non-aqueous media**

Ying Zhao,<sup>a</sup> Dong xue,<sup>†a</sup> Honglan Qi,<sup>a</sup> and Chengxiao Zhang<sup>†a</sup>

<sup>a</sup>*Key Laboratory of Applied Surface and Colloid Chemistry of Ministry of Education, School of Chemistry and Chemical Engineering, Shaanxi Normal University, Xi'an 710062, PR China*

<sup>†</sup>Corresponding authors: cxzhang@snnu.edu.cn, xuedong\_welcome@snnu.edu.c

### **Table of Contents**

|                    |                                                                              |            |
|--------------------|------------------------------------------------------------------------------|------------|
| <b>Figure S-1</b>  | Cyclic voltammograms of MB-Py and Bz-Py with different scan rates            | <b>S2</b>  |
| <b>Figure S-2</b>  | Cyclic voltammograms of MB-Py and Bz-Py                                      | <b>S2</b>  |
| <b>Figure S-3</b>  | Cyclic voltammogram of MB-Py at a platinum UME                               | <b>S3</b>  |
| <b>Figure S-4</b>  | Comparison between simulated and experimental oxidation waves for MB-Py      | <b>S4</b>  |
| <b>Figure S-5</b>  | Comparison between simulated and experimental reduction waves for MB-Py      | <b>S5</b>  |
| <b>Figure S-6</b>  | Comparison between simulated and experimental oxidation waves for Bz-Py      | <b>S6</b>  |
| <b>Figure S-7</b>  | Comparison between simulated and experimental reduction waves for Bz-Py      | <b>S7</b>  |
| <b>Figure S-8</b>  | Absorbance and PL spectra of MB-Py, Bz-Py and Py at different concentrations | <b>S8</b>  |
| <b>Figure S-9</b>  | Absorbance and PL spectra of MB-Py, Bz-Py and Py in different solvents       | <b>S9</b>  |
| <b>Figure S-10</b> | ECL-CV simultaneous measurements and normalized ECL spectra of BZ-Py         | <b>S10</b> |

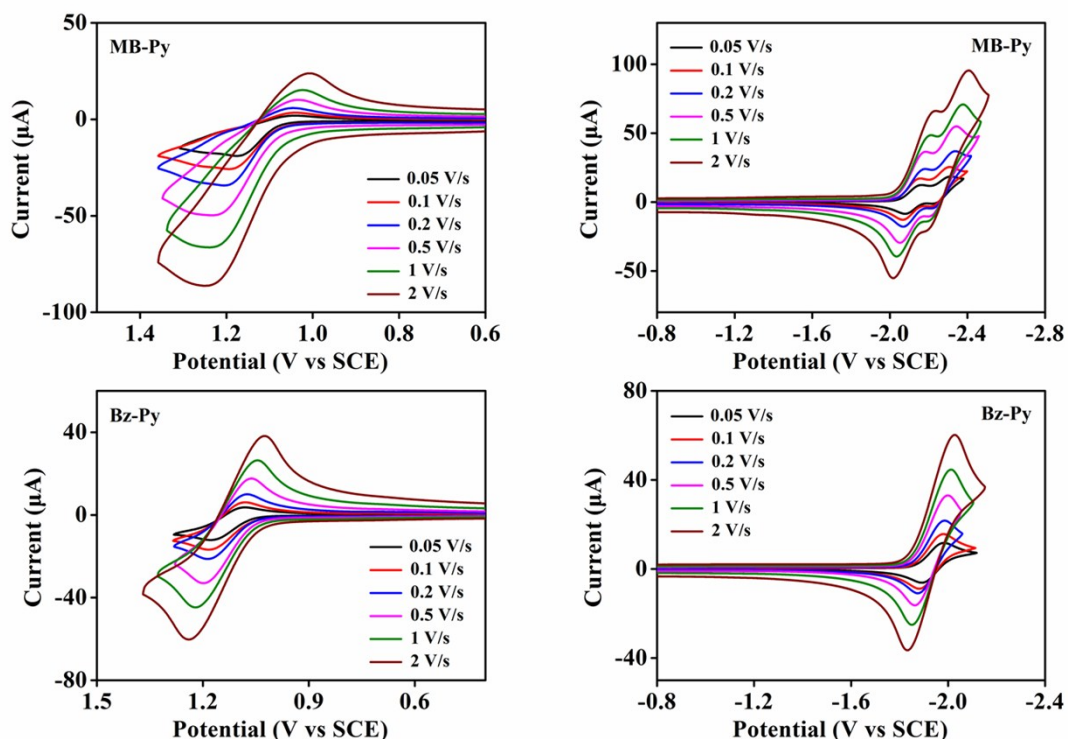

**Figure S-1.** Cyclic voltammograms of MB-Py (2.5 mM) and Bz-Py (2 mM) in MeCN:Bz (v:v=1:1) containing 0.1 M TBAPF<sub>6</sub> at Pt electrode(0.027 cm<sup>2</sup>) with different scan rates.

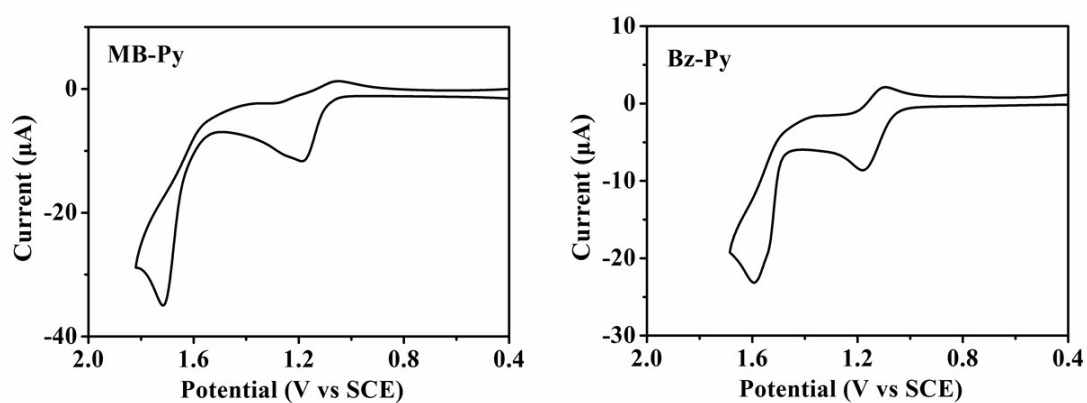

**Figure S-2.** Cyclic voltammograms of MB-Py (1.0 mM) and Bz-Py (1.0 mM) in MeCN:Bz (v:v=1:1) containing 0.1 M TBAPF<sub>6</sub> at Pt electrode (0.027 cm<sup>2</sup>) with a scan rate of 0.1 V/s.

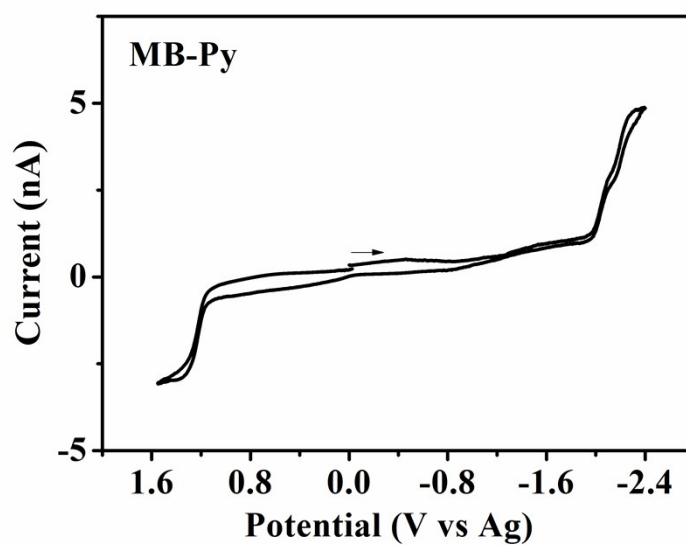

**Figure S-3.** Cyclic voltammogram of MB-Py (2.5 mM) at a platinum UME ( $r = 11\mu\text{m}$ ) in MeCN:Bz ( $v:v=1:1$ ) containing 0.1 M TBAPF<sub>6</sub> with a scan rate of 10 mV/s.

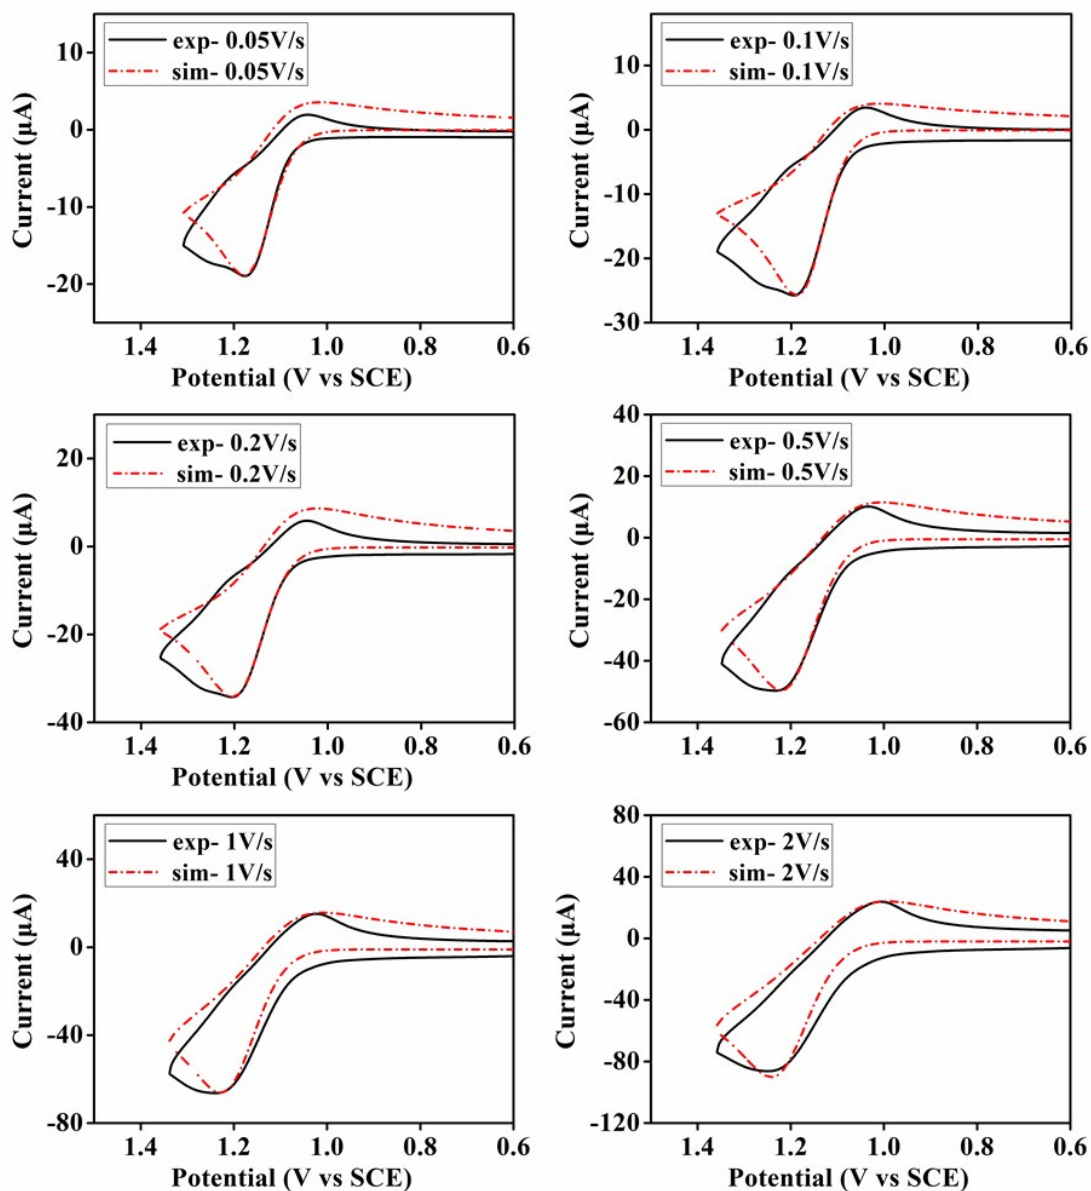

**Figure S-4.** Comparison between simulated and experimental oxidation waves for 2.5 mM MB-Py at different scan rates. The model for these oxidation simulations: EC, with  $n = 1$ , with a heterogeneous rate constant,  $\alpha = 0.5$ ,  $k^0 = 1 \times 10^4$  cm/s and a homogeneous forward rate constant,  $k_{eq} = 0.8$ ,  $k_f = 20$  s<sup>-1</sup>. Simulated data:  $E^0 = 1.11$  V vs. SCE; Diffusion coefficient:  $1.36 \times 10^{-5}$  cm<sup>2</sup>/s, uncompensated resistance 853  $\Omega$ , capacitance  $3 \times 10^{-6}$  F. Experimental conditions: solvent: MeCN:Bz (v:v=1:1), supporting electrolyte: 0.1 M TBAPF<sub>6</sub>, Pt electrode area 0.027 cm<sup>2</sup>.

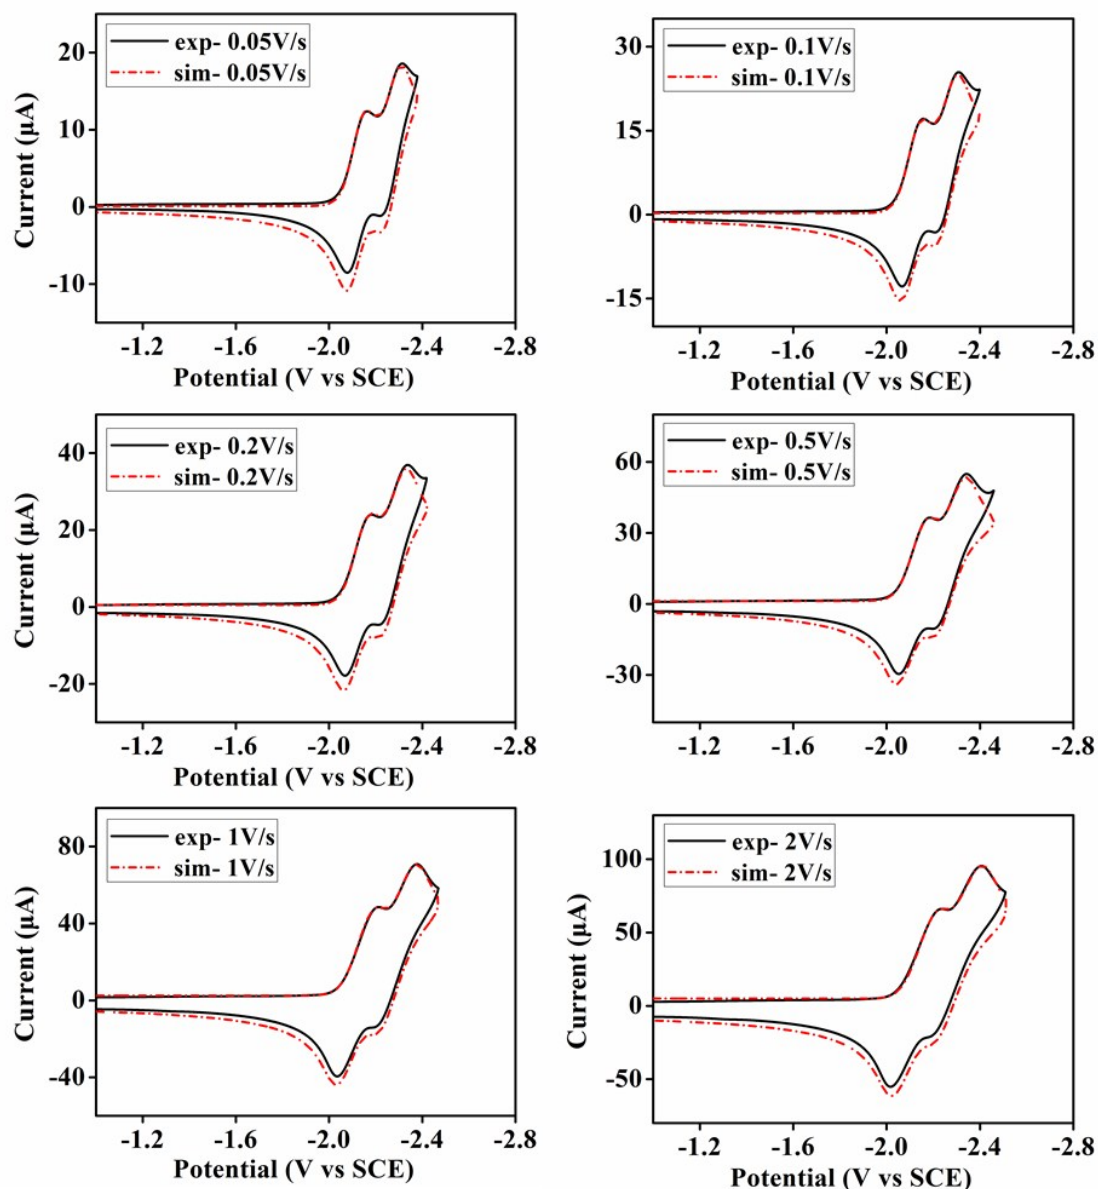

**Figure S-5.** Comparison between simulated and experimental reduction waves for 2.5 mM MB-Py at different scan rates. The model for these reduction simulations: ECE, with  $n = 2$ , with a heterogeneous rate constant,  $\alpha = 0.5$ ,  $k_1^0 = 0.012$  cm/s,  $k_2^0 = 0.015$  cm/s. Simulated data:  $E_{1/2,1}^0 = -2.12$  V vs. SCE,  $E_{1/2,2}^0 = -2.27$  V vs. SCE; Diffusion coefficient:  $1.36 \times 10^{-5}$  cm<sup>2</sup>/s, uncompensated resistance 603  $\Omega$ , capacitance  $1 \times 10^{-6}$  F. Experimental conditions: solvent: MeCN:Bz ( $v:v=1:1$ ), supporting electrolyte: 0.1 M TBAPF<sub>6</sub>, Pt electrode area 0.027 cm<sup>2</sup>.

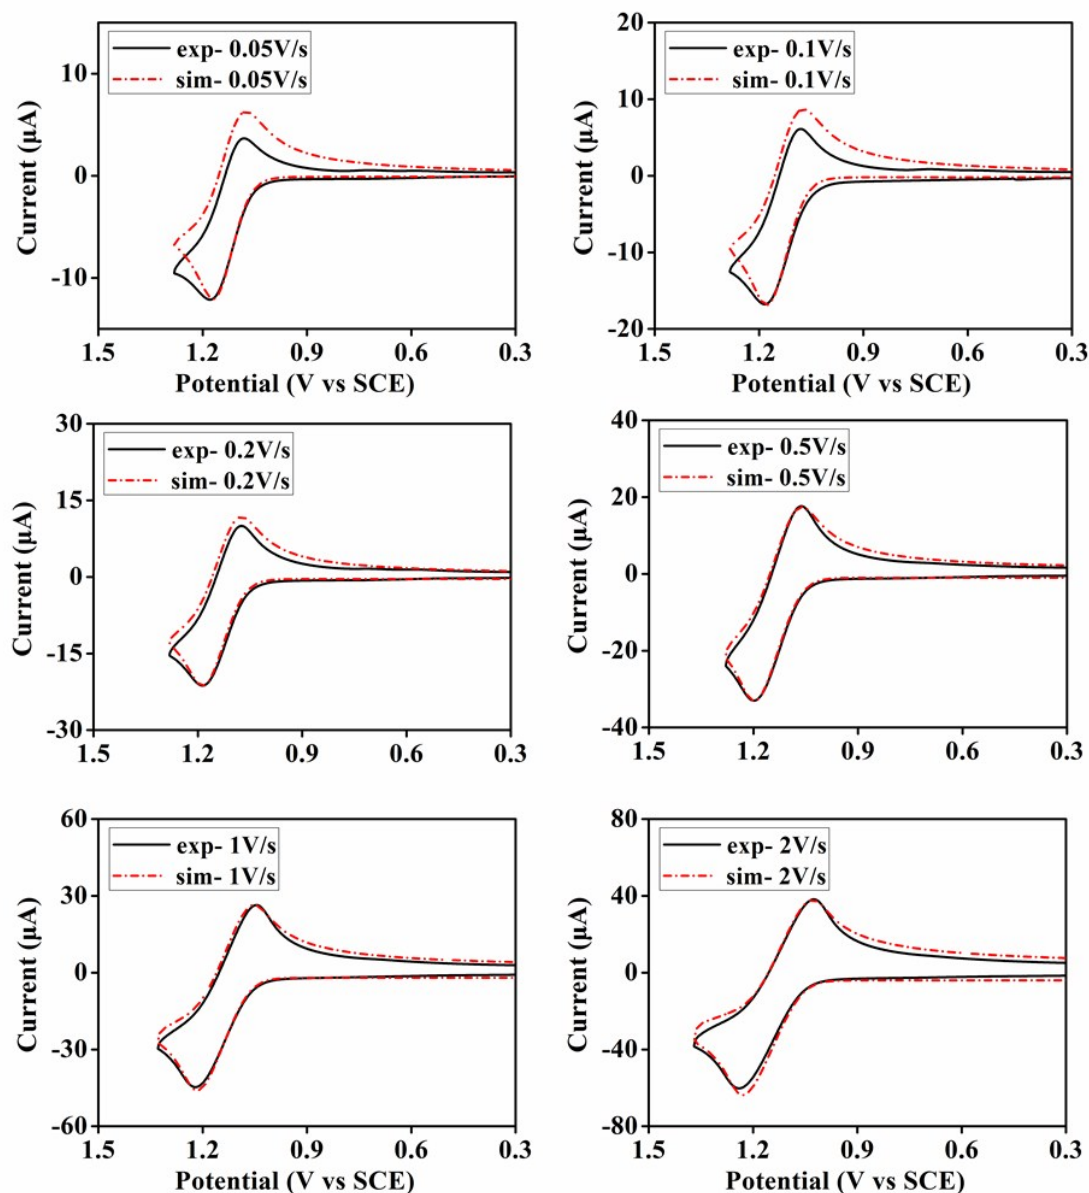

**Figure S-6.** Comparison between simulated and experimental oxidation waves for 2 mM BZ-Py at different scan rates. The model for these oxidation simulations: EC, with  $n = 1$ , with a heterogeneous rate constant,  $\alpha = 0.5$ ,  $k^0 = 1 \times 10^4$  cm/s and a homogeneous forward rate rate constant,  $k_{eq} = 0.8$ ,  $k_f = 18$  s<sup>-1</sup>. Simulated data:  $E^o = 1.13$  V vs. SCE; Diffusion coefficient:  $9.80 \times 10^{-6}$  cm<sup>2</sup>/s, uncompensated resistance 927  $\Omega$ , capacitance  $3 \times 10^{-6}$  F. Experimental conditions: solvent: MeCN:Bz (v:v=1:1), supporting electrolyte: 0.1 M TBAPF<sub>6</sub>, Pt electrode area 0.027 cm<sup>2</sup>.

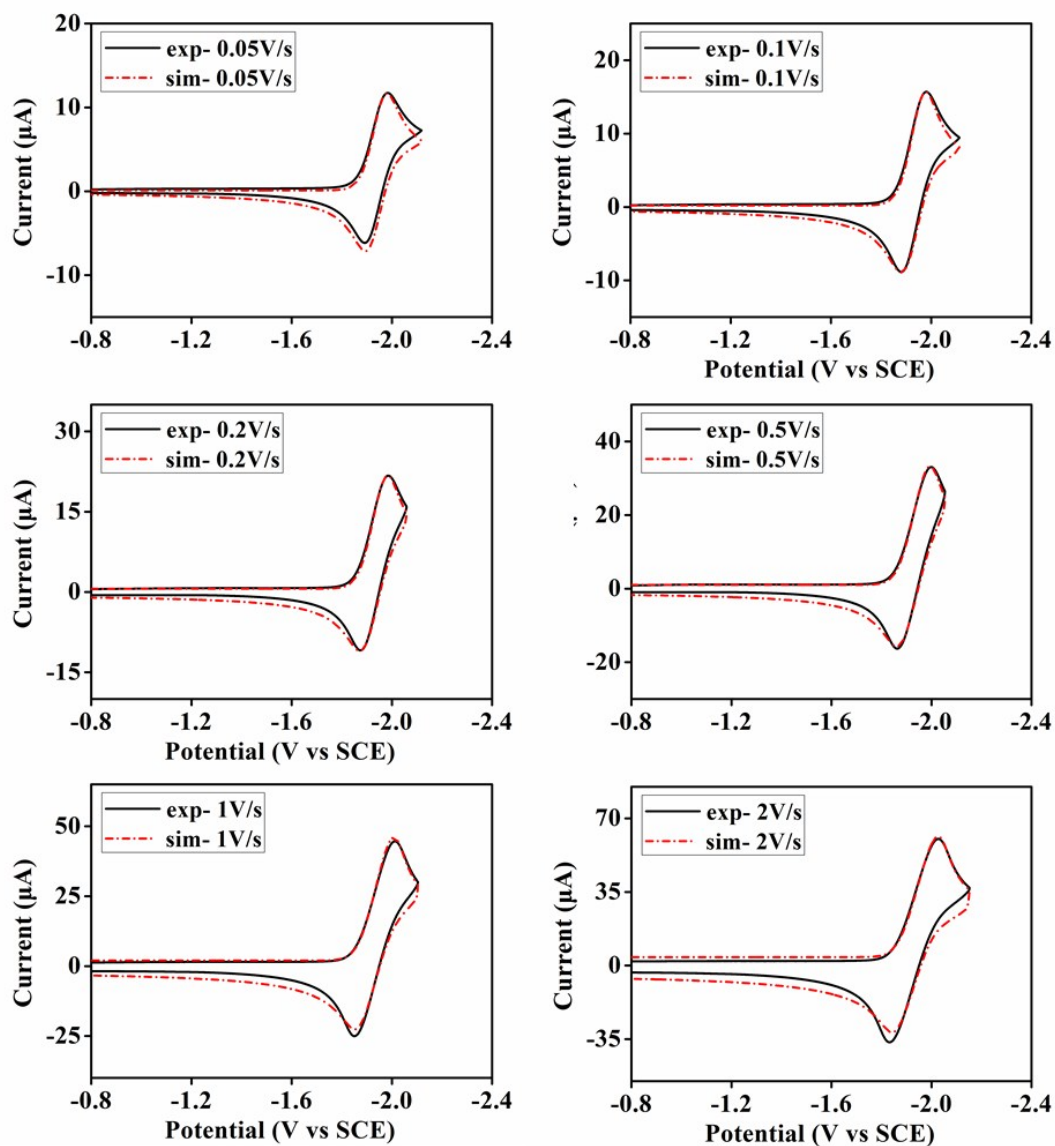

**Figure S-7.** Comparison between simulated and experimental reduction waves for 2 mM Bz-Py at different scan rates. The model for these reduction simulations: EC, with  $n = 1$ , with a heterogeneous rate constant,  $\alpha = 0.5$ ,  $k^0 = 1 \times 10^4$  cm/s and a homogeneous forward rate rate constant,  $k_{eq} = 0.8$ ,  $k_f = 18$  s<sup>-1</sup>. Simulated data:  $E^0 = -1.94$  V vs. SCE; Diffusion coefficient:  $9.80 \times 10^{-6}$  cm<sup>2</sup>/s, uncompensated resistance 1011  $\Omega$ , capacitance  $2 \times 10^{-6}$  F. Experimental conditions: solvent: MeCN:Bz ( $v:v = 1:1$ ), supporting electrolyte: 0.1 M TBAPF<sub>6</sub>, Pt electrode area 0.027 cm<sup>2</sup>.



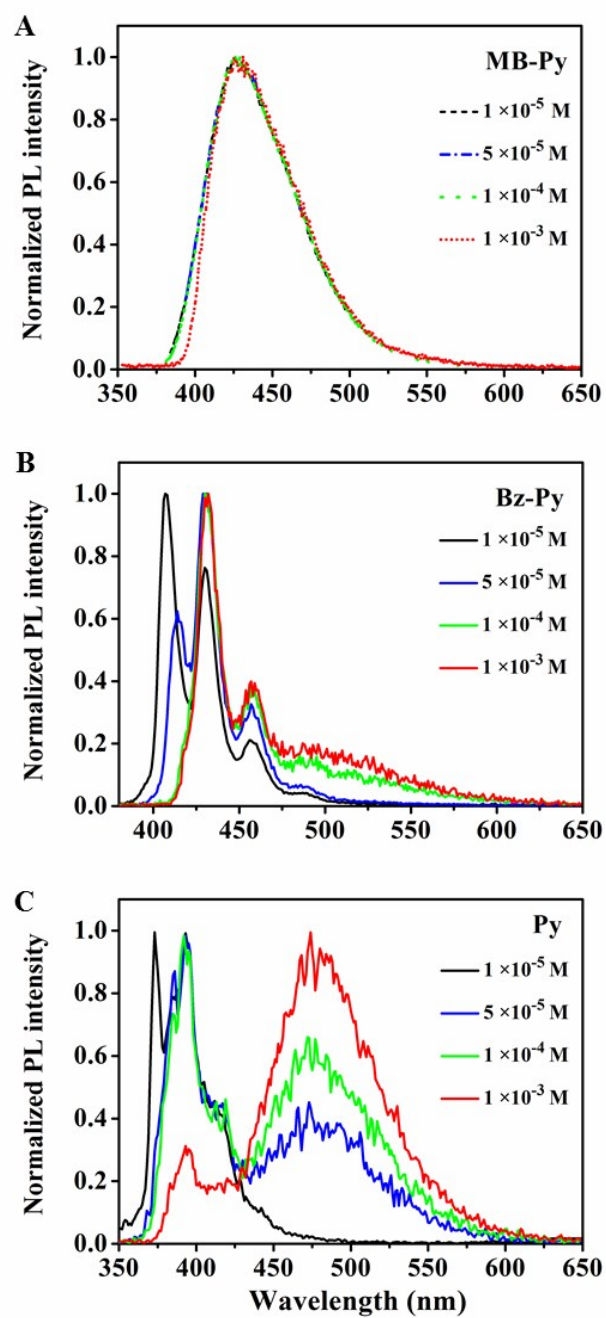

**Figure S-8.** Absorbance and PL spectra of (A) MB-Py, (B) Bz-Py and (C) Py at different concentrations in MeCN:Bz ( $v:v=1:1$ ) (excitation at  $\lambda_{\text{abs, max}}$ ).



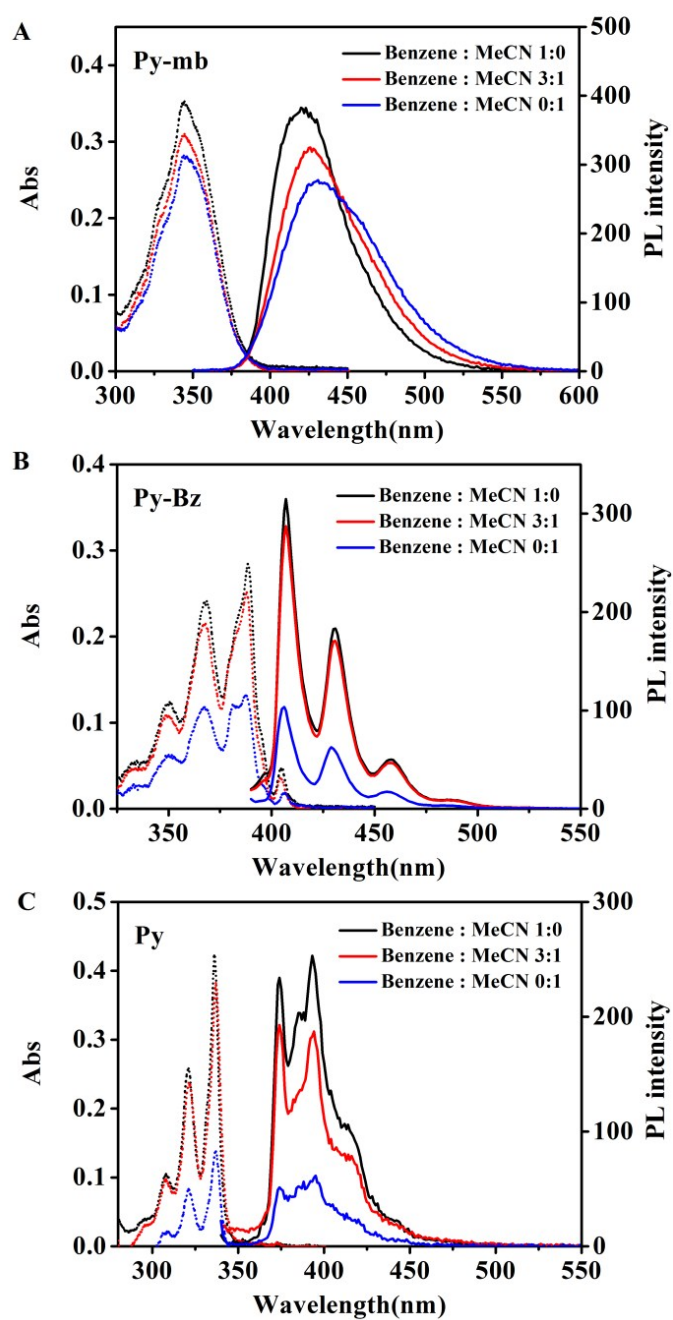

**Figure S-9.** Absorbance and PL spectra of (A) MB-Py, (B) Bz-Py and (C) Py in different ratio mixed solvents. (excitation at  $\lambda_{\text{abs, max}}$ ).

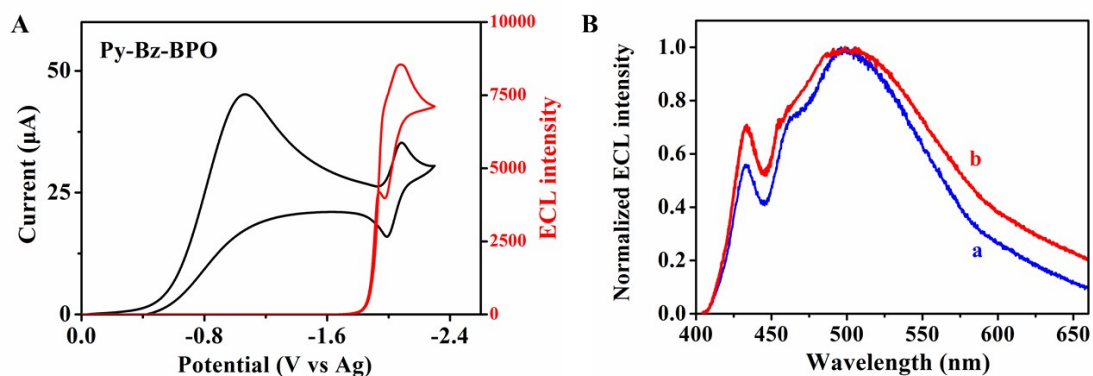

**Figure S-10.** (A) ECL (red) and CV (black) simultaneous measurements for 1 mM Bz-Py in the presence of 10 mM BPO with a scan rate of 0.1 V/s; (b) ECL spectra for 1 mM Bz-Py in the absence (blue, a) and presence (red, b) of 10 mM BPO; spectra were generated by pulsing the potential from 0 to -2.3 V versus Ag in MeCN:Bz (v:v=1:1) containing 0.1 M TBAPF<sub>6</sub>. Pulse width is 1 s, negative high-voltage: 600 V, Pt electrode area: 0.027 cm<sup>2</sup>.
